# Supplementary material
Source: publisher site journal article supplement (https://www.dovepress.com/get_supplementary_file.php?f=515523.docx)
Supplement: Supplementary file 1 [file get_supplementary_file.php]

# Search Strategy

| **Search** | **PubMed Query** | **Results** |
| --- | --- | --- |
| #4 | #1 AND #2 AND #3 | 626 |
| #3  Free vocabulary | cardiac[tiab] OR heart[tiab] OR cardiovascular[tiab] OR coronary[tiab] | 3,716,564 |
| Subject terms | OR “cardiac rehabilitation”[Mesh] OR “cardiovascular diseases”[Mesh] OR “heart”[Mesh] OR “cardiovascular nursing”[Mesh] |  |
| #2  Free vocabulary | home*[tiab] OR tele*[tiab] OR remote*[tiab] OR phase III[tiab] OR mhealth[tiab] OR m-health[tiab] OR mobile health[tiab] OR mobile application[tiab] OR mobile device[tiab] OR mobile phone[tiab] OR mobile technolog*[tiab] OR ehealth[tiab] OR e-health[tiab] OR digital health[tiab] OR website[tiab] OR web-based[tiab] OR virtual reality[tiab] OR smartphone[tiab] OR smart phone[tiab] | 1,092,457 |
| Subject terms | OR "home environment"[Mesh] OR "home health nursing"[Mesh] OR "home nursing"[Mesh] OR "home care services"[Mesh] |  |
| #1  Free vocabulary | choice architecture*[tiab] OR choice architect*[tiab] OR choice presentation*[tiab] OR choice intervention*[tiab] OR choice environment*[tiab] OR nudg*[tiab] OR nudge theory[tiab] OR behavioral economic*[tiab] OR behavioural economic*[tiab] OR behavioral design*[tiab] OR behavioural design*[tiab] OR environmental intervention*[tiab] OR environmental cue*[tiab] OR environmental modification*[tiab] OR environmental alteration*[tiab] OR environmental prompt*[tiab] OR environment intervention*[tiab] OR environment cue*[tiab] OR environment prompt *[tiab] OR environment modification*[tiab] OR environment alteration*[tiab] OR contextual change*[tiab] OR contextual cue*[tiab] OR behavior setting*[tiab] OR behaviour setting*[tiab] OR behavioral setting*[tiab] OR behavioural setting*[tiab] OR framing[tiab] OR loss frame*[tiab] OR gain frame*[tiab] OR social norm*[tiab] OR peer comparison*[tiab] OR information architecture*[tiab] OR default*[tiab] OR incentivize*[tiab] OR text messag*[tiab] | 72,260 |
| Subject terms | OR “economics, behavioral”[Mesh] OR social norm[Mesh] |  |

| **Search** | **OVID Query (Embase, Cochrane Library, JBI)** | **Results** |
| --- | --- | --- |
| 1 | (cardiac or heart or cardiovascular or coronary).ab,kw,ti. | 2,969,999 |
| 2 | (home* or tele* or remote* or phase III or mhealth or m-health or mobile health or mobile application or mobile device or mobile phone or mobile technolog* or ehealth or e-health or digital health or website or web-based or virtual reality or smartphone or smart phone).ab,kw,ti. | 1,588,800 |
| 3 | (choice architecture* or choice architect* or choice presentation* or choice intervention* or choice environment* or nudg* or nudge theory or behavioral economic* or behavioural economic* or behavioral design* or behavioural design* or environmental intervention* or environmental cue* or environmental modification* or environmental alteration* or environmental prompt* or environment intervention* or environment cue* or environment prompt * or environment modification* or environment alteration* or contextual change* or contextual cue* or behavior setting* or behaviour setting* or behavioral setting* or behavioural setting* or framing or loss frame* or gain frame* or social norm* or peer comparison* or information architecture* or default* or incentivize* or text messag*).ab,kw,ti. | 92,966 |
| 4 | 1 and 2 and 3 | 1,198 |

| **Search** | **Web of Science Query** | **Results** |
| --- | --- | --- |
| 1 | (cardiac or heart or cardiovascular or coronary).ab,kw,ti. | 1,742,303 |
| 2 | (home* or tele* or remote* or phase III or mhealth or m-health or mobile health or mobile application or mobile device or mobile phone or mobile technolog* or ehealth or e-health or digital health or website or web-based or virtual reality or smartphone or smart phone).ab,kw,ti. | 1,725,531 |
| 3 | (choice architecture* or choice architect* or choice presentation* or choice intervention* or choice environment* or nudg* or nudge theory or behavioral economic* or behavioural economic* or behavioral design* or behavioural design* or environmental intervention* or environmental cue* or environmental modification* or environmental alteration* or environmental prompt* or environment intervention* or environment cue* or environment prompt * or environment modification* or environment alteration* or contextual change* or contextual cue* or behavior setting* or behaviour setting* or behavioral setting* or behavioural setting* or framing or loss frame* or gain frame* or social norm* or peer comparison* or information architecture* or default* or incentivize* or text messag*).ab,kw,ti. | 1,083,893 |
| 4 | 1 and 2 and 3 | 4,151 |
